# Supplementary material for: The Quasimesenchymal Pancreatic Ductal Epithelial Cell Line PANC-1—A Useful Model to Study Clonal Heterogeneity and EMT Subtype Shifting
Source: Cancers (Basel). 2022 Apr 19;14(9):2057. doi: 10.3390/cancers14092057 (PMC9101310; doi:10.3390/cancers14092057)
Supplement: Supplementary file 1 [file cancers-14-02057-s001.zip › Table S1.pdf]

**Table S1.** Primers used for qPCR.

| <b>Gene</b>  | <b>Forward (5'→3')</b>          | <b>Reverse (5'→3')</b>        |
|--------------|---------------------------------|-------------------------------|
| BGN          | CCCTCTCCAGGTCCATCCGC            | GAGCTGGGTAGGTTGGGCGGG         |
| CK19         | ATGGCCGAGCAGAACCGGAA            | CCATGAGCCGCTGGTACTCC          |
| CLDN7        | AGCTGCAAAATGTACGACTCG           | GGAGACCACCATTAGGGCTC          |
| ECAD         | TCTTCCCCGCCCTGCCAATC            | GCCTCTCTCGAGTCCCCTAG          |
| EPCAM        | AATCGTCAATGCCAGTGTACTT          | TTCATCGCAGTCAGGATCATAA        |
| GAPDH        | TTGCCATCAATGACCCCTTCA           | CGCCCCACTTGATTTTGGA           |
| GRHL2        | GGGGAAGAGCAACGAGTGG             | GCGCTGGTCGTCTTTGAGA           |
| INS          | GCAGCCTTTGTGAACCAACAC           | CCCCGCACACTAGGTAGAGA          |
| NEUROG<br>3  | GGCGCTGACTCAAACGCTGC            | AAGCCAGACTGCCTGGGCTC          |
| OVOL2        | ACAGGCATTCGTCCCTACAAA           | CGCTGCTTATAGGCATACTGC         |
| RAC1         | ACCATGCAGGCCATCAAGTGTGTGG       | TTACAACAGCAGGCATTTTCTCT<br>TC |
| RAC1b        | GGAGAAACGTACGGTAAGGATATAA<br>CC | GGCAATCGGCTTGTCTTTGCCC        |
| SERPINE<br>1 | CTTCTTCAGGCTGTTCCGGAGC          | GGGTCAGGGTTCCATCACTTGG        |
| SNAI1        | CTGCTCCACAAGCACCAAGAGTC         | CCAGCTGCCCTCCCTCCAC           |
| SNAI2        | ATATTCGGACCCACACATTACCT         | GCAAATGCTCTGTTGCAGTGA         |
| TBP          | GCTGGCCCATAGTGATCTTT            | CTTCACACGCCAAGAAACAG          |
| VIM          | TGGCAGGTCTTGACCTTGAA            | GGTCATCGTGATGCTGAGAA          |
